# Supplementary material
Source: publisher figshare collection journal article supplement (https://acs.figshare.com/ndownloader/files/31571753)
Supplement: Supplementary file 1 [file 31571753]

1  
2  
3  
4  
5  
6  
7  
8  
9  
10  
11  
12  
13  
14  
15  
16  
17

## Supporting Information for

# Surface acidity and As(V) complexation of iron oxyhydroxides: insights from first principles molecular dynamics simulations

Yingchun Zhang,<sup>†</sup> Xiandong Liu,<sup>\*,†</sup> Jun Cheng,<sup>‡</sup> Xiancai Lu<sup>†</sup>

<sup>†</sup>State Key Laboratory for Mineral Deposits Research, School of Earth Sciences and  
Engineering, Nanjing University, Nanjing, Jiangsu 210023, P. R. China

<sup>‡</sup>College of Chemistry and Chemical Engineering, Xiamen University, Xiamen,  
Fujian 361005, P. R. China

\*Corresponding author: xiandongliu@nju.edu.cn. Tel: +86 25 83594664, Fax: +86 25  
83686016.

Number of pages: 22

Number of tables: 5

Number of figures: 12

|    |                                                                                                                                  |
|----|----------------------------------------------------------------------------------------------------------------------------------|
| 18 | This file includes the following contents:                                                                                       |
| 19 | <b>S1. Density profiles of water</b>                                                                                             |
| 20 | <b>Figure S1.</b> Water density profiles                                                                                         |
| 21 | <b>S2. pK<sub>a</sub> calculation method</b>                                                                                     |
| 22 | <b>Table S1.</b> Fe-Fe and Fe-O distances (in Å) in the central layers of the surficial                                          |
| 23 | systems and bulk crystal                                                                                                         |
| 24 | <b>Table S2.</b> The parameters used for restraining the dummy atoms                                                             |
| 25 | <b>Figure S2.</b> Vertical energy gaps of $\equiv\text{Fe}_2\text{OH}$ and $\equiv\text{Fe}_2\text{OH}_2$ on (010) surface       |
| 26 | <b>Table S3.</b> Calculated vertical energy gaps, thermodynamic integrals, and pK <sub>a</sub>                                   |
| 27 | values                                                                                                                           |
| 28 | <b>S3. Free energy calculation</b>                                                                                               |
| 29 | <b>Figure S3.</b> Models used for As(V) complexation on goethite (110) surface                                                   |
| 30 | <b>S4. FPMD details</b>                                                                                                          |
| 31 | <b>S5. Interfacial structures</b>                                                                                                |
| 32 | <b>Figure S4.</b> Radial distribution function (RDF) and coordination number (CN)                                                |
| 33 | between water and $\equiv\text{Fe}_2\text{OH}$ on (010) surface                                                                  |
| 34 | <b>Figure S5.</b> RDF and CN between water and $\equiv\text{FeOH}/\equiv\text{Fe}_3\text{OH}$ on (001) surface                   |
| 35 | <b>Figure S6.</b> RDF and CN between water and $\equiv\text{Fe}_2\text{OH}/\equiv\text{Fe}_2\text{O}_m\text{H}$ on (001) surface |
| 36 | <b>Figure S7.</b> RDF and CN between water and $\equiv\text{FeO}_U\text{H}_2/\equiv\text{FeO}_L\text{H}_2$ on (100) surface      |
| 37 | <b>S6. Additional information for the desorption processes</b>                                                                   |
| 38 | <b>Figure S8.</b> Snapshots of As(V) complexes on goethite (110) surface                                                         |
| 39 | <b>Figure S9.</b> Snapshots of As(V) complexes on lepidocrocite (001) surface                                                    |

40 **Figure S10.** Desorption free energy curves of coordinated H<sub>2</sub>O on goethite (110)

41 and lepidocrocite (001) surfaces

42 **Figure S11.** The extended desorption free energy curve

43 **Figure S12.** Snapshot of H<sub>2</sub>AsO<sub>4</sub><sup>-</sup> on lepidocrocite (001) surface at Fe<sub>II</sub>-O<sub>II</sub>

44 distance of 6.0 Å

45 **Table S4.** The average Fe-As distances of As(V) complexes on goethite and

46 lepidocrocite

47 **Table S5.** The simulation types and net charges of systems presented in Figure 6

48

49

50

51

## S1. Density profiles of water

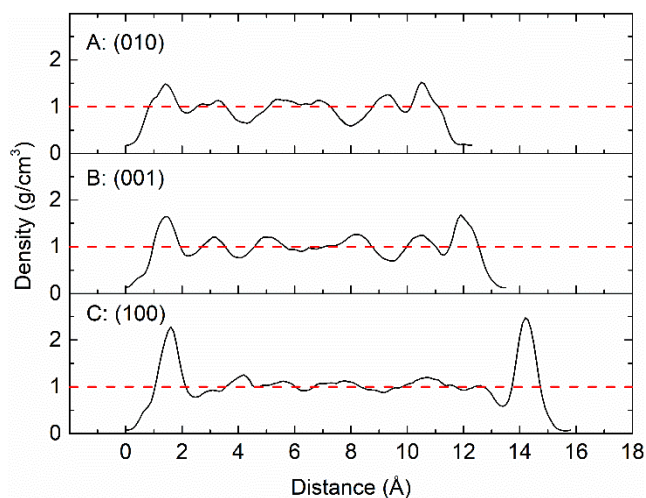

Figure S1. Water density profiles of (A) (010), (B) (001), and (C) (010) systems. The mid-plane between surface O atoms and first-layer water O atoms was taken as the starting point of the density profile for each system. It is clear that the densities in the middle regions are very close to 1.00 g/cm<sup>3</sup> and the density distributions are approximately symmetric with respect to the center of the solution regions.

## S2. pK<sub>a</sub> calculation method

**Table S1.** Fe-Fe and Fe-O distances (in Å) in the central layers of the slabs and bulk crystal.  $d1_{\text{Fe-Fe}}$  is the distance between iron atoms in the same iron layer;  $d2_{\text{Fe-Fe}}$  is the distance between iron atoms in different iron layers of the same lepidocrocite sheet;  $d_{\text{Fe-O}}$  is the distance between iron and oxygen atom of hydroxyl group.

| Systems | $d1_{\text{Fe-Fe}}$ | $d2_{\text{Fe-Fe}}$ | $d_{\text{Fe-O}}$ |
|---------|---------------------|---------------------|-------------------|
| bulk    | 3.06                | 3.08                | 2.01              |
| (010)   | 3.06                | 3.06                | 2.00              |
| (001)   | 3.06                | 3.06                | 2.01              |
| (100)   | 3.05                | 3.08                | 2.01              |

64

65 The pK<sub>a</sub> values of lepidocrocite surface groups were evaluated via the half-reaction  
 66 scheme of the vertical energy gap method.<sup>1, 2</sup> With this scheme, the proton of the acid  
 67 site (labeled as AH) is gradually transformed into a classical particle with no charge  
 68 (i.e. the dummy atom). The free energy change associated with this process is calculated  
 69 with the thermodynamic integration relation:

$$70 \quad \Delta_{dp}A_{AH} = \int_0^1 d\eta \langle \Delta_{dp}E_{AH} \rangle_{r\eta} \quad (1)$$

71  $\eta$  is the coupling parameter that increased from 0 (reactant) to 1 (product).  $\Delta_{dp}E$  is the  
 72 vertical energy gap, which is defined as the potential energy difference between the  
 73 reactant and product states. This value is obtained from the FPMD trajectory produced  
 74 by sampling the restrained mapping Hamiltonian:

$$75 \quad H_\eta = (1-\eta)H_R + \eta H_P + V_r \quad (2)$$

76 Here  $H_R$  and  $H_P$  stand for the reactant and product states respectively. The harmonic  
 77 restraint ( $V_r$ ) is applied on the dummy atom to keep it in the location resembling the  
 78 reactant state:

$$79 \quad V_r = \sum_{bonds} \frac{1}{2} k_d (d - d_0)^2 + \sum_{angles} \frac{1}{2} k_\theta (\theta - \theta_0)^2 \quad (3)$$

80 This harmonic potential consists of the bond stretching and angle bending terms  
 81 whose equilibrium values are  $d_0$  and  $\theta_0$ , respectively. The equilibrium values used for  
 82 each surface group were derived from the simulations without restraints and the force  
 83 constants  $k_d$  and  $k_\theta$  were selected according to previous studies.<sup>1, 3</sup> The parameters of  $V_r$   
 84 are given in Table S2. The 3-point Simpson's rule (Eq. 4) was employed to evaluate

the integral in Eq. 1 for most of the surface groups. For  $\equiv\text{Fe}_2\text{OH}$  on (010) surface and  $\equiv\text{Fe}_2\text{OH}/\equiv\text{Fe}_2\text{O}_m\text{H}/\equiv\text{Fe}_3\text{OH}$  on (001) surface, the 5-point formula (Eq. 5) was used due to the significant nonlinearities of  $\Delta E$  in these systems.

$$\Delta_{dp} A_{AH} = \frac{1}{6}(\langle\Delta E\rangle_0 + \langle\Delta E\rangle_1) + \frac{2}{3}\langle\Delta E\rangle_{0.5} \quad (4)$$

$$\Delta_{dp} A_{AH} = \frac{1}{12}(\langle\Delta E\rangle_0 + \langle\Delta E\rangle_1 + 4(\langle\Delta E\rangle_{0.25} + \langle\Delta E\rangle_{0.75}) + 2\langle\Delta E\rangle_{0.5}) \quad (5)$$

With the same procedure, one proton of a hydronium located in the solution region is transformed into a dummy atom, and the associated free energy is calculated with Eq. 1. The final  $\text{pK}_a$  is calculated according to the formula:

$$2.3k_B T \text{pK}_a = \int_0^1 d\eta \langle \Delta_{dp} E_{AH} \rangle_{r\eta} - \int_0^1 d\eta \langle \Delta_{dp} E_{H_3O^+} \rangle_{r\eta} + k_B T \ln [c^0 \Lambda_{H^+}^3] \quad (6)$$

$c^0 = 1 \text{ mol/L}$  is the unit molar concentration and  $\Lambda_{H^+}^3$  means the thermal wavelength of the proton.<sup>2</sup> The last term stands for the translational entropy generated by the acid dissociation and can be approximated by the chemical potential of a free proton at the standard concentration, which equals -0.19 eV.

The convergence of the  $\text{pK}_a$  calculation was determined by monitoring the vertical energy gap. By taking  $\equiv\text{Fe}_2\text{OH}$  and  $\equiv\text{Fe}_2\text{OH}_2$  on (010) surface as examples, Figure S2 shows the raw vertical energy gap data and the accumulative averages, where one can see that the vertical energy gaps were all converged within 0.05 eV in the periods. This is consistent with the observation in our previous calculations that  $\Delta E$  converged on a typical FPMD timescale.<sup>1, 4, 5</sup>

**Table S2.** The parameters used for restraining the dummy atoms (harmonic potentials in Eq. (3)).  $H_d$  represents the dummy atom.  $n_d$  and  $n_\theta$  mean the number of restrained

106 bonds and angles, respectively.  $d_0$  stands for equilibrium bond lengths (in Bohr), and  $\theta_0$   
 107 stands for equilibrium angles (in radian).

| Surface | Group                                 | $n_d$ | $d_0$ | $k_d$ | $n_\theta$ | $\theta_0$                  | $k_\theta$ |
|---------|---------------------------------------|-------|-------|-------|------------|-----------------------------|------------|
| (010)   | $\equiv\text{Fe}_2\text{OH}$          | 1     | 1.89  | 1.0   | 2          | 2.02 (Fe-O-H <sub>d</sub> ) | 0.1        |
|         |                                       |       |       |       |            | 2.02 (Fe-O-H <sub>d</sub> ) | 0.1        |
|         | $\equiv\text{Fe}_2\text{OH}_2$        | 2     | 1.89  | 1.0   | 3          | 2.00 (Fe-O-H <sub>d</sub> ) | 0.1        |
|         |                                       |       |       |       |            | 2.00 (Fe-O-H <sub>d</sub> ) | 0.1        |
|         |                                       |       |       |       |            | 1.80 (H-O-H <sub>d</sub> )  | 0.1        |
|         | $\text{H}_3\text{O}^+$                | 3     | 1.89  | 1.0   | 2          | 1.94 (H-O-H <sub>d</sub> )  | 0.1        |
|         |                                       |       |       |       |            | 1.94 (H-O-H <sub>d</sub> )  | 0.1        |
|         |                                       |       |       |       |            | 1.89                        | 1.0        |
|         | $\equiv\text{FeOH}$                   | 1     | 1.89  | 1.0   | 1          | 1.94 (Fe-O-H <sub>d</sub> ) | 0.1        |
|         |                                       |       |       |       |            | 2.24 (Fe-O-H <sub>d</sub> ) | 0.1        |
| (001)   | $\equiv\text{FeOH}_2$                 | 2     | 1.89  | 1.0   | 2          | 1.88 (H-O-H <sub>d</sub> )  | 0.1        |
|         |                                       |       |       |       |            | 1.88 (H-O-H <sub>d</sub> )  | 0.1        |
|         | $\equiv\text{Fe}_2\text{OH}$          | 1     | 1.89  | 1.0   | 2          | 1.95 (Fe-O-H <sub>d</sub> ) | 0.1        |
|         |                                       |       |       |       |            | 1.95 (Fe-O-H <sub>d</sub> ) | 0.1        |
|         | $\equiv\text{Fe}_2\text{OH}_2$        | 2     | 1.89  | 1.0   | 3          | 1.88 (Fe-O-H <sub>d</sub> ) | 0.1        |
|         |                                       |       |       |       |            | 1.88 (Fe-O-H <sub>d</sub> ) | 0.1        |
|         |                                       |       |       |       |            | 1.81 (H-O-H <sub>d</sub> )  | 0.1        |
|         | $\equiv\text{Fe}_2\text{O}_m\text{H}$ | 1     | 1.89  | 1.0   | 2          | 1.95 (Fe-O-H <sub>d</sub> ) | 0.1        |
|         |                                       |       |       |       |            | 1.95 (Fe-O-H <sub>d</sub> ) | 0.1        |
|         | $\equiv\text{Fe}_3\text{OH}$          | 1     | 1.89  | 1.0   | 3          | 2.08 (Fe-O-H <sub>d</sub> ) | 0.1        |

|       |                                  |   |      |     |   |                             |     |
|-------|----------------------------------|---|------|-----|---|-----------------------------|-----|
|       |                                  |   |      |     |   | 2.08 (Fe-O-H <sub>d</sub> ) | 0.1 |
|       |                                  |   |      |     |   | 2.08 (Fe-O-H <sub>d</sub> ) | 0.1 |
|       | H <sub>3</sub> O <sup>+</sup>    | 3 | 1.89 | 1.0 | 2 | 1.94 (H-O-H <sub>d</sub> )  | 0.1 |
|       |                                  |   | 1.89 | 1.0 |   | 1.94 (H-O-H <sub>d</sub> )  | 0.1 |
|       |                                  |   | 1.89 | 1.0 |   |                             |     |
| <hr/> |                                  |   |      |     |   |                             |     |
| (100) | ≡FeO <sub>U</sub> H <sub>2</sub> | 2 | 1.89 | 1.0 | 3 | 1.96 (Fe-O-H <sub>d</sub> ) | 0.1 |
|       |                                  |   | 1.89 | 1.0 |   | 1.82 (H-O-H <sub>d</sub> )  | 0.1 |
|       |                                  |   |      |     |   | 1.96 (Fe-O-H)               | 0.1 |
|       | ≡FeO <sub>L</sub> H <sub>2</sub> | 2 | 1.89 | 1.0 | 2 | 1.68 (Fe-O-H <sub>d</sub> ) | 0.1 |
|       |                                  |   | 1.89 | 1.0 |   | 1.80 (H-O-H <sub>d</sub> )  | 0.1 |
|       | H <sub>3</sub> O <sup>+</sup>    | 3 | 1.89 | 1.0 | 2 | 1.94 (H-O-H <sub>d</sub> )  | 0.1 |
|       |                                  |   | 1.89 | 1.0 |   | 1.94 (H-O-H <sub>d</sub> )  | 0.1 |
|       |                                  |   | 1.89 | 1.0 |   |                             |     |
| <hr/> |                                  |   |      |     |   |                             |     |

108

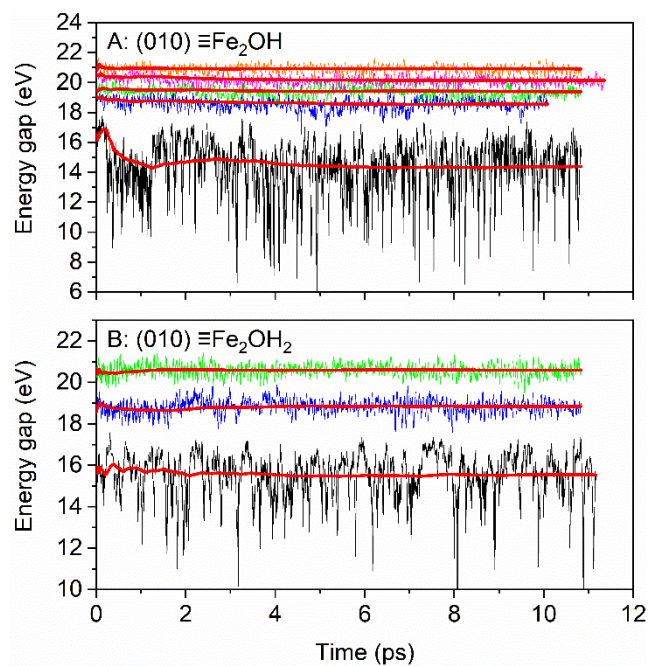

109



110 Figure S2. The accumulative averages of vertical energy gaps for (A)  $\equiv\text{Fe}_2\text{OH}$  and (B)  
111  $\equiv\text{Fe}_2\text{OH}_2$  on (010) surface. The statistical error was estimated as the difference between  
112 the first and the second half of the production run.

113 **Table S3.** Calculated vertical energy gaps (in eV), thermodynamic integrals (in eV), and pK<sub>a</sub> values.

| Surface | Group                                 | $\eta=0.0$       | $\eta=0.25$      | $\eta=0.5$       | $\eta=0.75$      | $\eta=1.0$       | $\Delta A$       | pK <sub>a</sub> |
|---------|---------------------------------------|------------------|------------------|------------------|------------------|------------------|------------------|-----------------|
| (010)   | $\equiv\text{Fe}_2\text{OH}$          | 14.38 $\pm$ 0.02 | 18.56 $\pm$ 0.04 | 19.39 $\pm$ 0.02 | 20.14 $\pm$ 0.03 | 20.91 $\pm$ 0.02 | 19.07 $\pm$ 0.03 | 11.5 $\pm$ 0.7  |
|         | $\equiv\text{Fe}_2\text{OH}_2$        | 15.53 $\pm$ 0.04 |                  | 18.84 $\pm$ 0.01 |                  | 20.59 $\pm$ 0.01 | 18.58 $\pm$ 0.01 | 3.3 $\pm$ 0.3   |
|         | H <sub>3</sub> O <sup>+</sup>         | 14.34 $\pm$ 0.02 |                  | 18.50 $\pm$ 0.01 |                  | 20.80 $\pm$ 0.02 | 18.19 $\pm$ 0.01 |                 |
| (001)   | $\equiv\text{FeOH}$                   | 16.82 $\pm$ 0.03 |                  | 19.84 $\pm$ 0.03 |                  | 21.21 $\pm$ 0.01 | 19.56 $\pm$ 0.03 | 11.7 $\pm$ 0.8  |
|         | $\equiv\text{FeOH}_2$                 | 16.46 $\pm$ 0.02 |                  | 19.36 $\pm$ 0.01 |                  | 20.99 $\pm$ 0.04 | 19.15 $\pm$ 0.01 | 4.8 $\pm$ 0.5   |
|         | $\equiv\text{Fe}_2\text{OH}$          | 15.95 $\pm$ 0.03 | 18.70 $\pm$ 0.05 | 19.35 $\pm$ 0.02 | 20.17 $\pm$ 0.01 | 20.73 $\pm$ 0.01 | 19.24 $\pm$ 0.03 | 6.3 $\pm$ 0.8   |
|         | $\equiv\text{Fe}_2\text{OH}_2$        | 16.63 $\pm$ 0.01 |                  | 18.86 $\pm$ 0.02 |                  | 20.39 $\pm$ 0.05 | 18.74 $\pm$ 0.02 | -2.0 $\pm$ 0.7  |
|         | $\equiv\text{Fe}_2\text{O}_m\text{H}$ | 14.32 $\pm$ 0.04 | 19.16 $\pm$ 0.05 | 19.92 $\pm$ 0.03 | 20.40 $\pm$ 0.03 | 20.98 $\pm$ 0.02 | 19.45 $\pm$ 0.04 | 9.9 $\pm$ 1.0   |
|         | $\equiv\text{Fe}_3\text{OH}$          | 16.09 $\pm$ 0.01 | 18.55 $\pm$ 0.04 | 19.21 $\pm$ 0.04 | 19.98 $\pm$ 0.05 | 20.70 $\pm$ 0.02 | 19.11 $\pm$ 0.04 | 4.2 $\pm$ 1.0   |
|         | H <sub>3</sub> O <sup>+</sup>         | 15.06 $\pm$ 0.05 |                  | 19.04 $\pm$ 0.01 |                  | 20.81 $\pm$ 0.04 | 18.67 $\pm$ 0.02 |                 |
| (100)   | $\equiv\text{FeO}_U\text{H}_2$        | 14.03 $\pm$ 0.04 |                  | 19.01 $\pm$ 0.02 |                  | 20.73 $\pm$ 0.05 | 18.47 $\pm$ 0.03 | 6.0 $\pm$ 0.8   |
|         | $\equiv\text{FeO}_L\text{H}_2$        | 14.98 $\pm$ 0.02 |                  | 19.77 $\pm$ 0.03 |                  | 21.21 $\pm$ 0.02 | 19.21 $\pm$ 0.02 | 18.4 $\pm$ 0.7  |

H<sub>3</sub>O<sup>+</sup>

14.42±0.04

18.10±0.01

20.71±0.05

17.92±0.02

114

115

### S3. Free energy calculation

The desorption free energies of As(V) from lepidocrocite and goethite surfaces were evaluated according to the thermodynamic integration relation:<sup>6</sup>

$$\Delta F(X) = - \int_{X^0}^X f(X') dX' \quad (7)$$

where  $\Delta F$  stands for the free energy change,  $X$  means the reaction coordinate, and  $f$  is the mean force. The mean forces were derived by using the method of constraint in the blue-moon ensemble. Figure 2 and Figure S3 present the initial configurations of As(V) species on lepidocrocite (001) and goethite (110) surfaces, respectively. As(V) species were placed on only one side of the surface slab, which was the common practice in the simulation community. On both surfaces, As(V) species were separated from their periodic images by about four layers of water, which was enough to minimize the adsorbate-adsorbate interactions. The surface coverages were estimated to be  $\sim 0.21$  mg/m<sup>2</sup> ( $\sim 1.46$   $\mu$ mol/m<sup>2</sup>) for lepidocrocite (001) surface and  $\sim 0.24$  mg/m<sup>2</sup> ( $\sim 1.66$   $\mu$ mol/m<sup>2</sup>) for goethite (110) surface. These values are similar to 1.40  $\mu$ mol/m<sup>2</sup> reported in Mamindy-Pajany et al.<sup>7</sup>

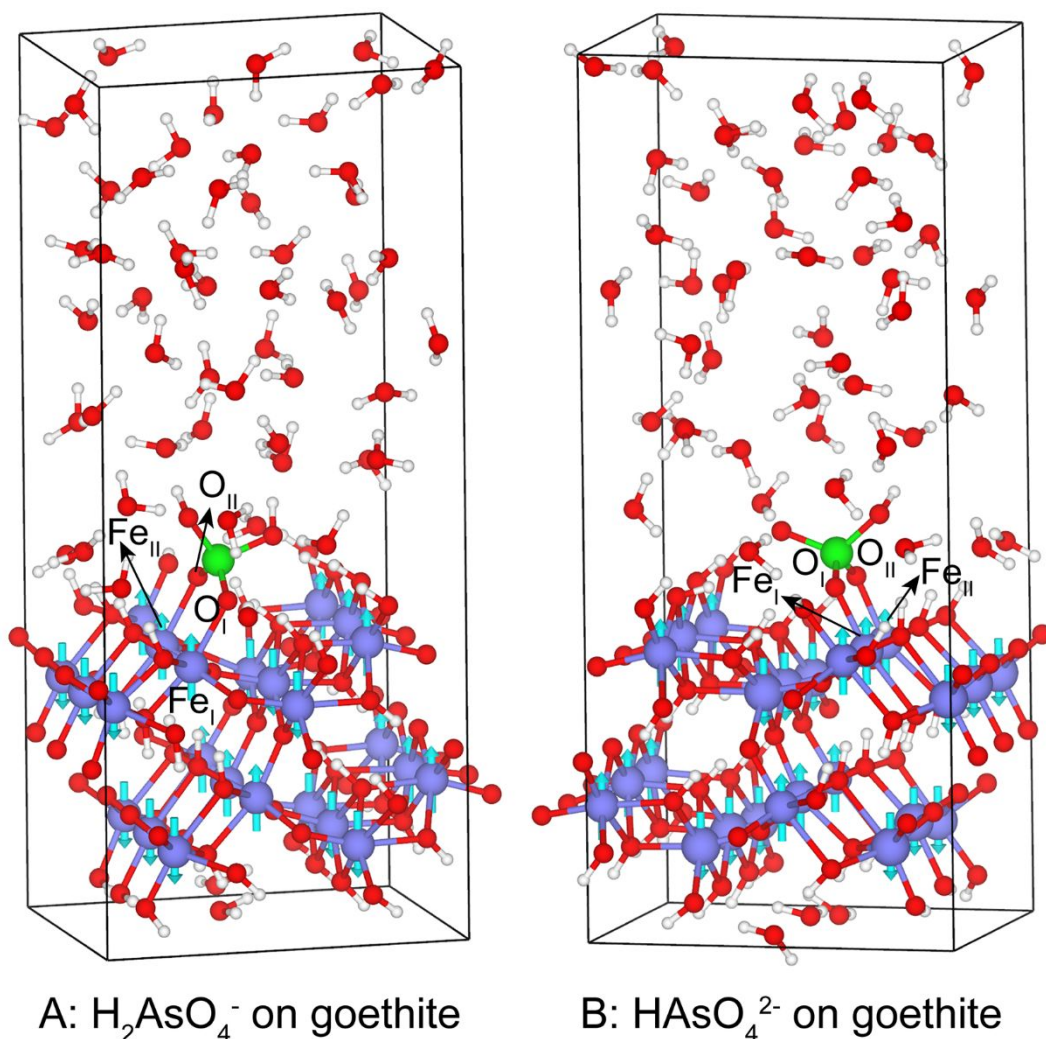

Figure S3. Models used for (A)  $\text{H}_2\text{AsO}_4^-$  and (B)  $\text{HAsO}_4^{2-}$  complexation on goethite (110) surface. oxygen = red, hydrogen = white, iron = blue-violet, arsenic = green. Cyan arrows indicate the electron spin orientations.

#### S4. FPMD details

All FPMD simulations were performed using CP2K/QUICKSTEP package.<sup>8-10</sup> The electronic structures were calculated with the Gaussian and Plane Wave (GPW) density functional scheme.<sup>11</sup> The electronic wavefunctions were constructed using a double- $\zeta$  Gaussian-type orbital basis with polarization functions (DZVP) and the electron density was represented with the plane-wave basis expanded to 360 Ry. The core electron states

were described using Goedecker-Teter-Hutter (GTH) pseudopotentials.<sup>12</sup> The exchange-correlation interaction was treated in the generalized gradient approximation (GGA) in the parameterization of Perdew, Burke, and Ernzerhof (PBE).<sup>13</sup> The GGA+U approach with a  $U_{\text{eff}}$  correction value of 4 eV was adopted to correct the description of 3d electrons in Fe atoms in lepidocrocite.<sup>14</sup> Van der Waals corrections were included with the DFT-D3 method.<sup>15</sup> Wave functions were optimized to a tolerance of 1.0E-6.

Antiferromagnetic ordering was adopted for goethite and lepidocrocite following previous simulations.<sup>16-21</sup> The antiferromagnetic spin structure determined by Guo and Barnard<sup>22</sup> was applied for lepidocrocite, where Fe atoms in the same double-layer had antiparallel spins (Figure 1). For goethite, antiparallel spins on alternating layers along [010] direction were adopted (Figure S3).<sup>21</sup> The predicted band gap for lepidocrocite was 1.85 eV, close to the experimental value 2.06 eV.<sup>23</sup> The total magnetic moments of lepidocrocite and goethite were calculated to be zero, in agreement with their antiferromagnetic properties.

Born-Oppenheimer type molecular dynamics (BOMD) simulations were carried out in NVT ensemble with a time step of 0.5 fs. The temperature was maintained at 330 K with the Nosé-Hoover chain thermostat to avoid the glassy behavior of DFT liquid water at a lower temperature.<sup>24</sup> For each FPMD simulation, a production run was performed for over 10.0 ps after an equilibration run for at least 5.0 ps.

## **S5. Interfacial structures**

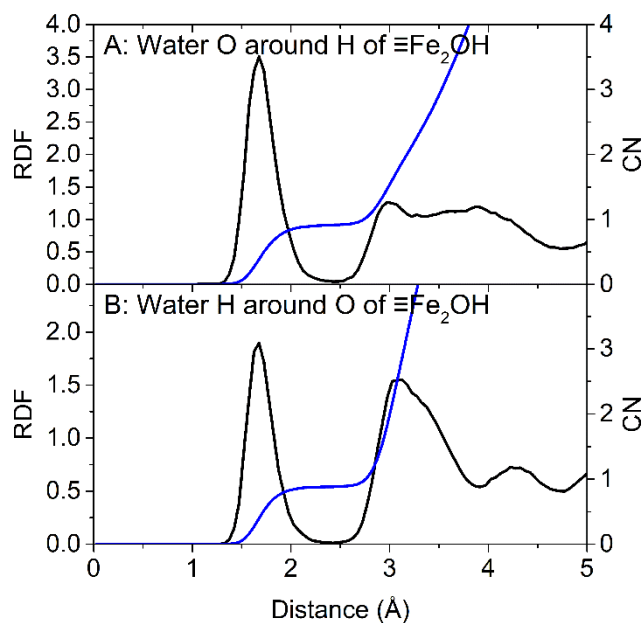

Figure S4. Radial distribution function (RDF) and coordination number (CN) for (A) water O around H of  $\equiv\text{Fe}_2\text{OH}$  and (B) water H around O of  $\equiv\text{Fe}_2\text{OH}$  on (010) surface.

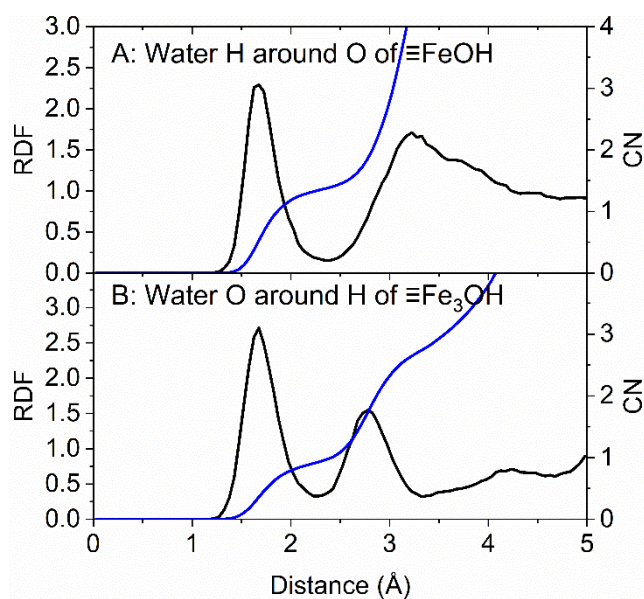

Figure S5. RDF and CN for (A) water H around O of  $\equiv\text{FeOH}$  and (B) water O around H of  $\equiv\text{Fe}_3\text{OH}$  on (001) surface.

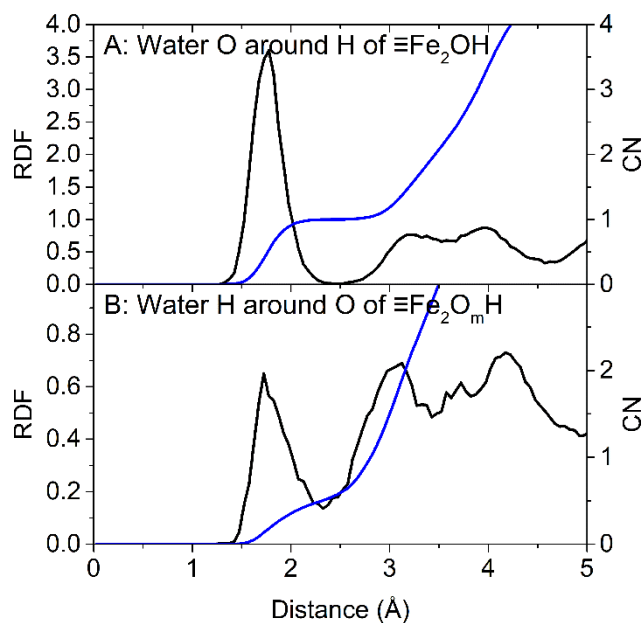

Figure S6. RDF and CN for (A) water O around H of  $\equiv\text{Fe}_2\text{OH}$  and (B) water H around O of  $\equiv\text{Fe}_2\text{O}_m\text{H}$  on (001) surface.

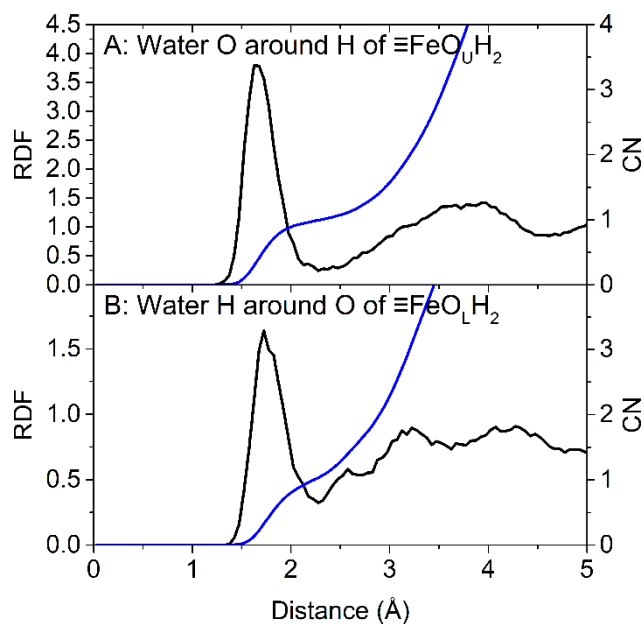

Figure S7. RDF and CN for (A) water O around H of  $\equiv\text{FeO}_u\text{H}_2$  and (B) water H around O of  $\equiv\text{FeO}_l\text{H}_2$  on (100) surface.

## S6. Additional information for the desorption processes



### Complexation of As(V) on goethite

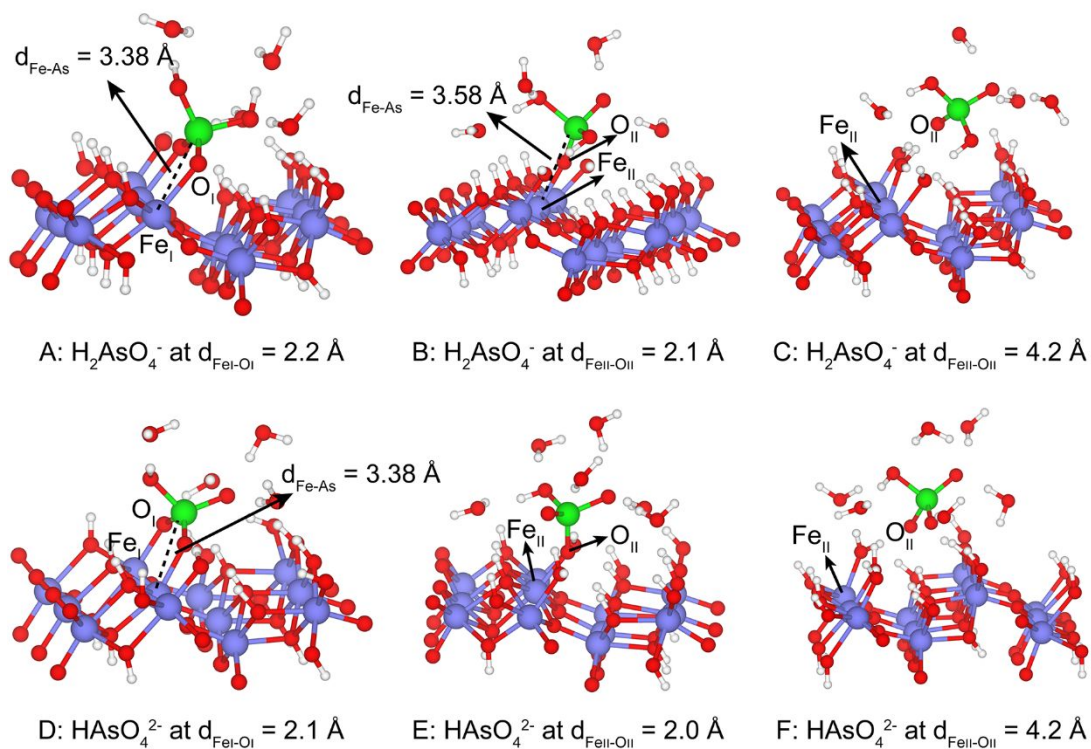

Figure S8. Snapshots of As(V) complexes on goethite (110) surface. Atoms are color-coded by element as described in Figure S3. Only the water molecules that hydrogen-bonded with As(V) species are depicted for clarity.

### Complexation of As(V) on lepidocrocite

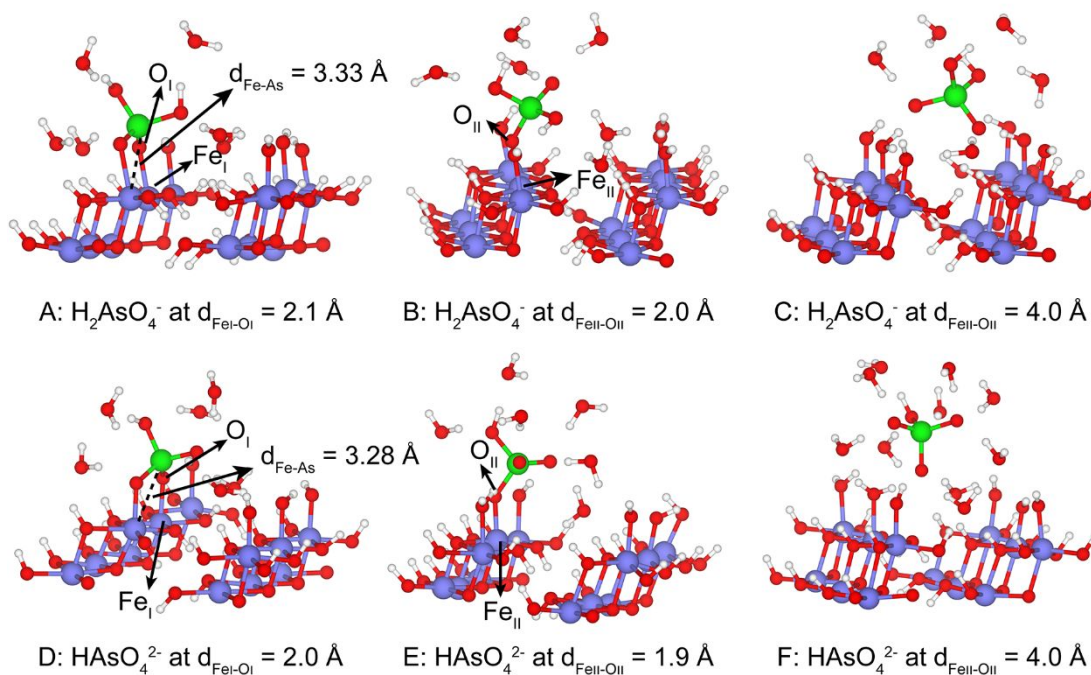

Figure S9. Snapshots of As(V) complexes on lepidocrocite (001) surface. Atoms are color-coded by element as described in Figure S3. Only the water molecules that hydrogen-bonded with As(V) species are depicted for clarity.

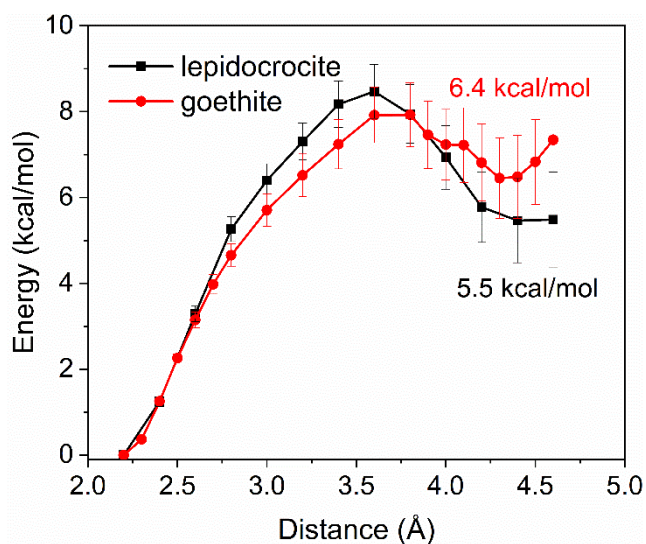

Figure S10. Desorption free energy curves of coordinated water on goethite (110) and lepidocrocite (001) surfaces.

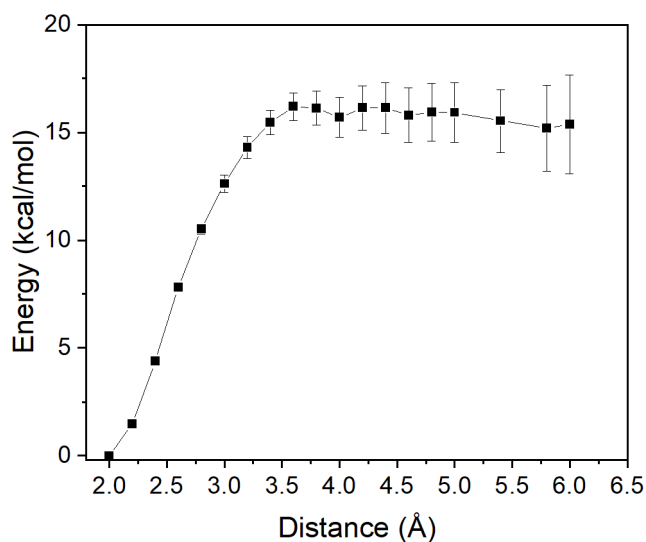

Figure S11. The extended desorption free energy curve of  $\text{H}_2\text{AsO}_4^-$  on lepidocrocite (001) surface.

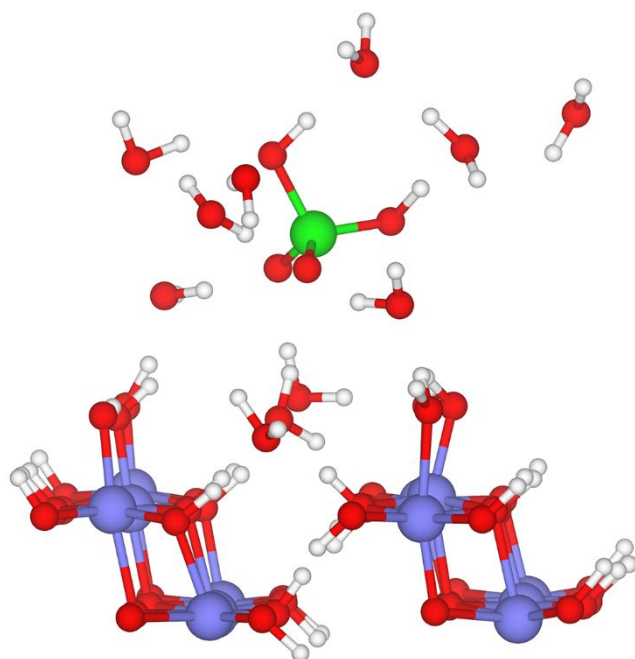

Figure S12. Snapshot of  $\text{H}_2\text{AsO}_4^-$  on lepidocrocite (001) surface at  $\text{Fe}_{\text{II}}\text{-O}_{\text{II}}$  distance of 6.0 Å. Atoms are color-coded by element as described in Figure S3. Only the water molecules that hydrogen-bonded with  $\text{H}_2\text{AsO}_4^-$  are depicted for clarity.

**Table S4.** The average Fe-As distances of As(V) complexes on goethite and lepidocrocite.

| Iron oxyhydroxides | Surface | Complexes                              | Fe-As distance (Å) |
|--------------------|---------|----------------------------------------|--------------------|
| Lepidocrocite      | (001)   | $\text{H}_2\text{AsO}_4^-$ bidentate   | 3.33               |
|                    | (100)   | $\text{HAsO}_4^{2-}$ bidentate         | 3.33               |
|                    |         | $\text{H}_2\text{AsO}_4^-$ bidentate   | 3.33               |
| Goethite           | (110)   | $\text{HAsO}_4^{2-}$ bidentate         | 3.38               |
|                    |         | $\text{H}_2\text{AsO}_4^-$ bidentate   | 3.38               |
|                    |         | $\text{H}_2\text{AsO}_4^-$ monodentate | 3.58               |
|                    | (010)   | $\text{HAsO}_4^{2-}$ bidentate         | 3.41               |
|                    |         | $\text{H}_2\text{AsO}_4^-$ bidentate   | 3.43               |

(021)  $\text{H}_2\text{AsO}_4^-$  monodentate 3.68

195 **Table S5.** The simulation types and net charges of systems presented in Figure 6.

| Iron<br>hydroxides | surface | As(V)<br>species           | Simulation type  | Free energy<br>calculation? | Net<br>charge |
|--------------------|---------|----------------------------|------------------|-----------------------------|---------------|
| Goethite           | (110)   | $\text{HAsO}_4^{2-}$       | Constrained FPMD | Yes                         | 0             |
|                    |         | $\text{H}_2\text{AsO}_4^-$ | Constrained FPMD | Yes                         | +1            |
|                    | (010)   | $\text{HAsO}_4^{2-}$       | FPMD             | No                          | -2            |
|                    |         | $\text{H}_2\text{AsO}_4^-$ | FPMD             | No                          | -1            |
|                    | (021)   | $\text{H}_2\text{AsO}_4^-$ | FPMD             | No                          | -1            |
|                    |         |                            |                  |                             |               |
| Lepidocrocite      | (001)   | $\text{HAsO}_4^{2-}$       | Constrained FPMD | Yes                         | 0             |
|                    |         | $\text{H}_2\text{AsO}_4^-$ | Constrained FPMD | Yes                         | +1            |
|                    | (100)   | $\text{HAsO}_4^{2-}$       | FPMD             | No                          | -2            |
|                    |         | $\text{H}_2\text{AsO}_4^-$ | FPMD             | No                          | -1            |

196

197

198 **REFERENCES**

- 199 (1) Cheng, J.; Sulpizi, M.; Sprik, M., Redox potentials and pKa for benzoquinone from  
200 density functional theory based molecular dynamics. *J. Chem. Phys.* **2009**, *131*, (15),  
201 154504.
- 202 (2) Costanzo, F.; Sulpizi, M.; Valle, R. G. D.; Sprik, M., The oxidation of tyrosine and  
203 tryptophan studied by a molecular dynamics normal hydrogen electrode. *J. Chem. Phys.*  
204 **2011**, *134*, (24), 244508.
- 205 (3) Sulpizi, M.; Sprik, M., Acidity constants from vertical energy gaps: density  
206 functional theory based molecular dynamics implementation. *Phys. Chem. Chem. Phys.*  
207 **2008**, *10*, (34), 5238-5249.
- 208 (4) Liu, X.; Lu, X.; Sprik, M.; Cheng, J.; Meijer, E. J.; Wang, R., Acidity of edge surface  
209 sites of montmorillonite and kaolinite. *Geochim. Cosmochim. Acta* **2013**, *117*, 180-190.
- 210 (5) Cheng, J.; Liu, X.; VandeVondele, J.; Sulpizi, M.; Sprik, M., Redox Potentials and  
211 Acidity Constants from Density Functional Theory Based Molecular Dynamics. *Acc.*  
212 *Chem. Res.* **2014**, *47*, (12), 3522-3529.
- 213 (6) Sprik, M.; Ciccotti, G., Free energy from constrained molecular dynamics. *J. Chem.*  
214 *Phys.* **1998**, *109*, (18), 7737-7744.
- 215 (7) Mamindy-Pajany, Y.; Hurel, C.; Marmier, N.; Roméo, M., Arsenic (V) adsorption  
216 from aqueous solution onto goethite, hematite, magnetite and zero-valent iron: Effects  
217 of pH, concentration and reversibility. *Desalination* **2011**, *281*, 93-99.
- 218 (8) VandeVondele, J.; Krack, M.; Mohamed, F.; Parrinello, M.; Chassaing, T.; Hutter,  
219 J., Quickstep: Fast and accurate density functional calculations using a mixed Gaussian  
220 and plane waves approach. *Comput. Phys. Commun.* **2005**, *167*, (2), 103-128.
- 221 (9) Hutter, J.; Iannuzzi, M.; Schiffmann, F.; VandeVondele, J., CP2K: atomistic  
222 simulations of condensed matter systems. *Wires. Comput. Mol. Sci.* **2014**, *4*, (1), 15-25.
- 223 (10) Kühne, T. D.; Iannuzzi, M.; Del Ben, M.; Rybkin, V. V.; Seewald, P.; Stein, F.;  
224 Laino, T.; Khaliullin, R. Z.; Schütt, O.; Schiffmann, F.; Golze, D.; Wilhelm, J.;  
225 Chulkov, S.; Bani-Hashemian, M. H.; Weber, V.; Borštnik, U.; TAILLEFUMIER, M.;  
226 Jakobovits, A. S.; Lazzaro, A.; Pabst, H.; Müller, T.; Schade, R.; Guidon, M.;  
227 Andermatt, S.; Holmberg, N.; Schenter, G. K.; Hehn, A.; Bussy, A.; Belleflamme, F.;  
228 Tabacchi, G.; Glöß, A.; Lass, M.; Bethune, I.; Mundy, C. J.; Plessl, C.; Watkins, M.;  
229 VandeVondele, J.; Krack, M.; Hutter, J., CP2K: An electronic structure and molecular  
230 dynamics software package - Quickstep: Efficient and accurate electronic structure  
231 calculations. *J. Chem. Phys.* **2020**, *152*, (19), 194103.
- 232 (11) Lippert, B. G.; Hutter, J.; Parrinello, M., A hybrid Gaussian and plane wave density  
233 functional scheme. *Mol. Phys.* **1997**, *92*, (92), 477-487.
- 234 (12) Goedecker, S.; Teter, M.; Hutter, J., Separable dual-space Gaussian  
235 pseudopotentials. *Phys. Rev. B* **1995**, *54*, (3), 1703--1710.
- 236 (13) Perdew, J. P.; Burke, K.; Ernzerhof, M., Generalized Gradient Approximation  
237 Made Simple. *Phys. Rev. Lett.* **1997**, *78*, (7), 1396.
- 238 (14) Pope, D. J.; Clark, A. E.; Rosso, K. M.; Prange, M. P., Rethinking the magnetic  
239 properties of lepidocrocite: A density functional theory and cluster expansion study. *J.*  
240 *Appl. Phys.* **2020**, *128*, (10), 103906.

- (15) Grimme, S.; Antony, J.; Ehrlich, S.; Krieg, H., A consistent and accurate ab initio parametrization of density functional dispersion correction (DFT-D) for the 94 elements H-Pu. *J. Chem. Phys.* **2010**, *132*, (15), 154104.
- (16) Borowski, S. C.; Biswakarma, J.; Kang, K.; Schenkeveld, W. D. C.; Hering, J. G.; Kubicki, J. D.; Kraemer, S. M.; Hug, S. J., Structure and reactivity of oxalate surface complexes on lepidocrocite derived from infrared spectroscopy, DFT-calculations, adsorption, dissolution and photochemical experiments. *Geochim. Cosmochim. Acta* **2018**, *226*, 244-262.
- (17) Guo, H.; Barnard, A. S., Proton transfer in the hydrogen-bonded chains of lepidocrocite: a computational study. *Phys. Chem. Chem. Phys.* **2011**, *13*, (39), 17864-17869.
- (18) Davantès, A.; Costa, D.; Lefèvre, G., Molybdenum(VI) Adsorption onto Lepidocrocite ( $\gamma$ -FeOOH): In Situ Vibrational Spectroscopy and DFT+U Theoretical Study. *J. Phys. Chem. C* **2016**, *120*, (22), 11871-11881.
- (19) McBriarty, M. E.; Soltis, J. A.; Kerisit, S.; Qafoku, O.; Bowden, M. E.; Bylaska, E. J.; De Yoreo, J. J.; Ilton, E. S., Trace Uranium Partitioning in a Multiphase Nano-FeOOH System. *Environ. Sci. Technol.* **2017**, *51*, (9), 4970-4977.
- (20) Tunega, D.; Zaoui, A., Adsorption of polycyclic aromatic hydrocarbons on FeOOH polymorphs: A theoretical study. *Surf. Sci.* **2021**, *706*, 121795.
- (21) Zhang, Y.; Liu, X.; Cheng, J.; Lu, X., Interfacial structures and acidity constants of goethite from first principles molecular dynamics simulation. *Am. Mineral.* **2021**, *106*, (11), 1736-1743.
- (22) Guo, H.; Barnard, A. S., Modeling the iron oxides and oxyhydroxides for the prediction of environmentally sensitive phase transformations. *Phys. Rev. B* **2011**, *83*, (9), 094112.
- (23) Cornell, R. M.; Schwertmann, U., *The iron oxides: structure, properties, reactions, occurrences and uses*. John Wiley & Sons: 2003.
- (24) VandeVondele, J.; Mohamed, F.; Krack, M.; Hutter, J.; Sprik, M.; Parrinello, M., The influence of temperature and density functional models in ab initio molecular dynamics simulation of liquid water. *J. Chem. Phys.* **2005**, *122*, (1), 014515.
